# Supplementary material for: Contributions of childhood adversities to chronic pain among mid-life employees
Source: PubMed Central journal article supplement (PMC9096588; doi:10.1177/1403494820981509), 2021-01-18
Supplement: sj-pdf-1-sjp-10.1177_1403494820981509.pdf [file sj-pdf-1-sjp-10.1177_1403494820981509.pdf]

Table S1. Associations between childhood adversity sum score and chronic pain in midlife. Odds ratios and their 95% confidence intervals.

|                                         | Model 1 = Age and gender | Model 1 + father's education | Model 1 + the participant's education + marital status | Model 1 + working conditions | Model 1 + sleep problems | Model 1 + common mental disorders |
|-----------------------------------------|--------------------------|------------------------------|--------------------------------------------------------|------------------------------|--------------------------|-----------------------------------|
| No childhood adversity (n=4129)         | 1.00                     | 1.00                         | 1.00                                                   | 1.00                         | 1.00                     | 1.00                              |
| 1 childhood adversity (n=2249)          | 1.24 (1.11–1.40)         | 1.23 (1.09–1.38)             | 1.22 (1.09–1.37)                                       | 1.20 (1.07–1.35)             | 1.19 (1.05–1.34)         | 1.20 (1.06–1.35)                  |
| 2–3 childhood adversities (n=1459)      | 1.65 (1.45–1.88)         | 1.61 (1.41–1.83)             | 1.60 (1.40–1.82)                                       | 1.55 (1.36–1.77)             | 1.51 (1.32–1.72)         | 1.54 (1.35–1.75)                  |
| 4 or more childhood adversities (n=175) | 1.85 (1.34–2.55)         | 1.84 (1.33–2.54)             | 1.76 (1.28–2.44)                                       | 1.72 (1.24–2.38)             | 1.55 (1.11–2.15)         | 1.61 (1.16–2.24)                  |
